# Supplementary material for: A Gene Circuit Combining the Endogenous I-E Type CRISPR-Cas System and a Light Sensor to Produce Poly-β-Hydroxybutyric Acid Efficiently
Source: MDPI journal article supplement (doi:10.3390/bios12080642), 2022-08-15
Supplement: s1 [file s1]

# A Gene Circuit Combining the Endogenous I-E Type CRISPR-Cas System and a Light Sensor to Produce Poly- $\beta$ -Hydroxybutyric Acid Efficiently

Xiaomeng Li <sup>1,2</sup>, Wei Jiang <sup>3</sup>, Qingsheng Qi <sup>1</sup> and Quanfeng Liang <sup>1,\*</sup>

<sup>1</sup> State Key Laboratory of Microbial Technology, Shandong University, No. 72, Binhai Road, Qingdao 266237, China;

<sup>2</sup> The Second Laboratory of Lanzhou Institute of Biological Products Co., Ltd., No. 888, Yanchang Road, Lanzhou 730046, China

<sup>3</sup> Research Center of Basic Medicine, Central Hospital Affiliated to Shandong First Medical University, No. 105, Jiefang Road, Jinan 250013, China

\* Correspondence: liangquanfeng@sdu.edu.cn; Tel.: +86-13573163779

**Table S1. Strains used in this study**

| Strains                     | Description                                                                                                                                                    | Source     |
|-----------------------------|----------------------------------------------------------------------------------------------------------------------------------------------------------------|------------|
|                             | F- <i>mcrA</i> $\Delta(mrr-hsdRMS-mcrBC)$ $\phi 80lacZ\Delta M15$                                                                                              |            |
| <i>E.coli</i> TOP10         | $\Delta lacX74$ <i>nupG</i> <i>recA1</i> <i>araD139</i> $\Delta(ara-leu)7697$ <i>galE15</i><br><i>galK16</i> <i>rpsL(StrR)</i> <i>endA1</i> $\lambda$ -        | Lab Stock  |
| <i>E. coli</i> DH5 $\alpha$ | F- <i>endA1</i> glnV44thi-1 <i>recA1</i> relA1gyrA96 <i>deoR</i> nupG $\Phi$ 80<br><i>lacZ</i> $\Delta$ M15 $\Delta(lacZYA-argF)$ U169, <i>hsdR17</i> (rK-mK+) | Lab Stock  |
| EE-E15                      | <i>E. coli</i> TOP10( $\Delta cas3$ )                                                                                                                          | Lab Stock  |
| Wide type                   | DH5 $\alpha$ carrying pHZ3.1 and pSR43.6                                                                                                                       | This study |
| #3                          | DH5 $\alpha$ carrying pHZ3.1 and pSR43.6#3                                                                                                                     | This study |
| #4                          | DH5 $\alpha$ carrying pHZ3.1 and pSR43.6#4                                                                                                                     | This study |
| #10                         | DH5 $\alpha$ carrying pHZ3.1 and pSR43.6#10                                                                                                                    | This study |
| SphZ                        | EE-E15 carrying pHZ-crRNA                                                                                                                                      | This study |
| S43.6                       | EE-E15 carrying 43.6-crRNA                                                                                                                                     | This study |
| Ara58.6                     | EE-E15 carrying Paracr58.6                                                                                                                                     | This study |
| Ara15A                      | EE-E15 carrying Paracr15A                                                                                                                                      | Lab Stock  |
| SlcrPHB                     | EE-E15 carrying pSR43.6#10 and pHZ-PHBcon                                                                                                                      | This study |

**Table S2. Plasmids used in this study**

| Plasmids        | Description                                                                 | Source                    |
|-----------------|-----------------------------------------------------------------------------|---------------------------|
| pHZ3.1(pSR58.6) | ColE1 ori, Cm <sup>R</sup> , CcaR, <i>cpcG2</i> promoter, sfGFP             | (Schmidl et al. 2014 [1]) |
| pSR43.6         | P15A ori, Sm <sup>R</sup> , CcaS, <i>hol</i> , <i>pcyA</i>                  | (Schmidl et al. 2014 [1]) |
| pSR43.6#10      | P15A ori, Sm <sup>R</sup> , CcaS#10, <i>hol</i> , <i>pcyA</i>               | This study                |
| pSR43.6#3       | P15A ori, Sm <sup>R</sup> , CcaS#3, <i>hol</i> , <i>pcyA</i>                | This study                |
| pSR43.6#4       | P15A ori, Sm <sup>R</sup> , CcaS#4, <i>hol</i> , <i>pcyA</i>                | This study                |
| pHZ-crRNA       | pHZ3.1 containing crRNA                                                     | This study                |
| 43.6-crRNA      | pSR43.6 containing crRNA                                                    | This study                |
| pHZ-PHBcon      | pHZ-crRNA plasmid containing constitutive <i>phbCAB</i> gene                | This study                |
| Paracr15A       | P15A ori, Sm <sup>R</sup> , araBAD operon and crRNA target <i>gltA</i> gene | Lab Stock                 |
| Paracr58.6      | ColE1ori, Cm <sup>R</sup> , araBAD operon and crRNA target <i>gltA</i> gene | This study                |

**Table S3. Primers used in this study**

| Primer name  | Sequence                                |
|--------------|-----------------------------------------|
| pHZ.F        | GATGGCCTTTTTGCGAAATACTAGATGCGTAAAGGCG   |
| pHZ.R        | CTCCTGCTAGCCCTCCTCTTTTTAAAAATGCGATCC    |
| crR.F        | CATTTTTAAAAAGAGGAGGGCTAGCAGGAGGAATTCAC  |
| crR.R        | TACGCATCTAGTATTTTCGCAAAAAGGCCATCCGTCAG  |
| phbCAB F2    | ACAGAATCAGGGGGGGCAAGTACCTTGCCGACATCTATG |
| phbCAB R     | CACATGTTCTTTCCTGCGTCTTCTGAATCCATGACCAG  |
| phzzj F      | GTCATGGATTGAGAAGACGCAGGAAAGAACATGTGAG   |
| phzzj R      | TCGGCAAGGTACTTGCCCCCCTGATTCTGTGGATAAC   |
| gRNAprimer F | GTAAAGGCGAAGAGCCATCGGTGATGTCGGCGATATAG  |
| gRNAprimer R | TGAAGGCCTTTATCAGGTTATTGTCTCATGAGCGGATAC |
| 58.6primer F | CATGAGACAATAACCTGATAAAGGCCTTCACATGGTCC  |
| 58.6primer R | CCGACATCACCGATGGCTCTTCGCCTTTACGCATTG    |
| #3 F         | GAATTATATGAGCAATTACAGCGACGCACGGAGGAAGTC |

|              |                                              |
|--------------|----------------------------------------------|
| #3 R         | CCGTGCGTCGCTGTAATTGCTCATATAATTCCGATTGTTG     |
| #4 F         | GGAATTATATGAGCAATTACAGCGCACGGAGGAAGTCCG      |
| #4 R         | CCTCCGTGCGCTGTAATTGCTCATATAATTCCGATTGTTG     |
| #10F         | TGAGCAATTACAGCTAGCTTTAGAACGGGAAAAAGAATTAAG   |
| #10R         | CGTTCTAAAGCTAGCTGTAATTGCTCATATAATTCCGATTGTTG |
| nocpc F      | CAAAGCCCATTGTGCTTAAGGCGGTAATACGGTTATC        |
| nocpc R      | AACCGTATTACCGCCTTAAGCACAAATGGGCTTTGCAG       |
| ZJZL.FOR     | AGGCCAGACTCCACCTGCAAAGCCCATTGTGCTTTTCTC      |
| ZJZL.REV     | TAGCGAGTCAGTGAGCGAGTCAGCGTCGTTACCAGAGTC      |
| psr43.6#.FOR | GCACAATGGGCTTTGCAGGTGGAGTCTGGCCTCAAATAC      |
| psr43.6#.REV | CTCTGGTAACGACGCTGACTCGCTCACTGACTCGCTAC       |

**Table S4. Parameters of LED strips**

| LED strip                                       |                                                                               |             |                             |       |                    |  |
|-------------------------------------------------|-------------------------------------------------------------------------------|-------------|-----------------------------|-------|--------------------|--|
| LED type                                        | 3528 SMD(Surface Mount Device) LED                                            |             |                             |       |                    |  |
| LED number                                      | 60 LEDs/meter                                                                 |             |                             |       |                    |  |
| Circuit board width                             | 6mm                                                                           |             |                             |       |                    |  |
| Nominal voltage                                 | 5V                                                                            |             |                             |       |                    |  |
| Waterproof                                      | NO                                                                            |             |                             |       |                    |  |
| Characteristics                                 | Soft LED strip.Each LED can be individually cut and plugged into the circuit. |             |                             |       |                    |  |
| LED                                             |                                                                               |             |                             |       |                    |  |
| Basic specifications                            |                                                                               |             |                             |       |                    |  |
| Size                                            | Power                                                                         |             | Operating temperature range |       |                    |  |
| 3.5mm * 2.8mm * 1.9mm (Length * Width * Height) | 0.06W                                                                         |             | -40°C——80°C                 |       |                    |  |
| Welding temperature                             | Reverse voltage                                                               |             | Pulse current               |       |                    |  |
| 260°C                                           | 5V                                                                            |             | 100mA                       |       |                    |  |
| Product parameters                              |                                                                               |             |                             |       |                    |  |
| Color                                           | Working current(mA)                                                           | Voltage (V) | Luminous intensity (mcd)    | Angle | The main wave band |  |
| Red                                             | 20mA                                                                          | 1.8-2.4     | 600-900                     | 120°  | 620-630nm          |  |
| Green                                           | 20mA                                                                          | 3.0-3.4     | 1000-1200                   | 120°  | 520-530nm          |  |
| Blue                                            | 20mA                                                                          | 3.0-3.4     | 300-500                     | 120°  | 460-470nm          |  |

According to the international system of units , the definition of Radiant flux and the Definition of the Candela , the following formula for deriving the Radiant flux(Unit: W) of LEDs can be obtained:

$$\partial\Phi_e = \frac{I_v(\lambda) \times \partial\Omega}{683.002 \text{ lm} / \text{W} \times \bar{y}(\lambda)}$$

$\Phi_e$  : the radiant flux

$I_v(\lambda)$  : the luminous intensity

$\Omega$  : the solid angle

$\bar{y}(\lambda)$  : the photonic luminosity functions

$\partial$  : the partial derivative symbol

**Figure S1. The relative fluorescence of different type of CcaS-CcaR**

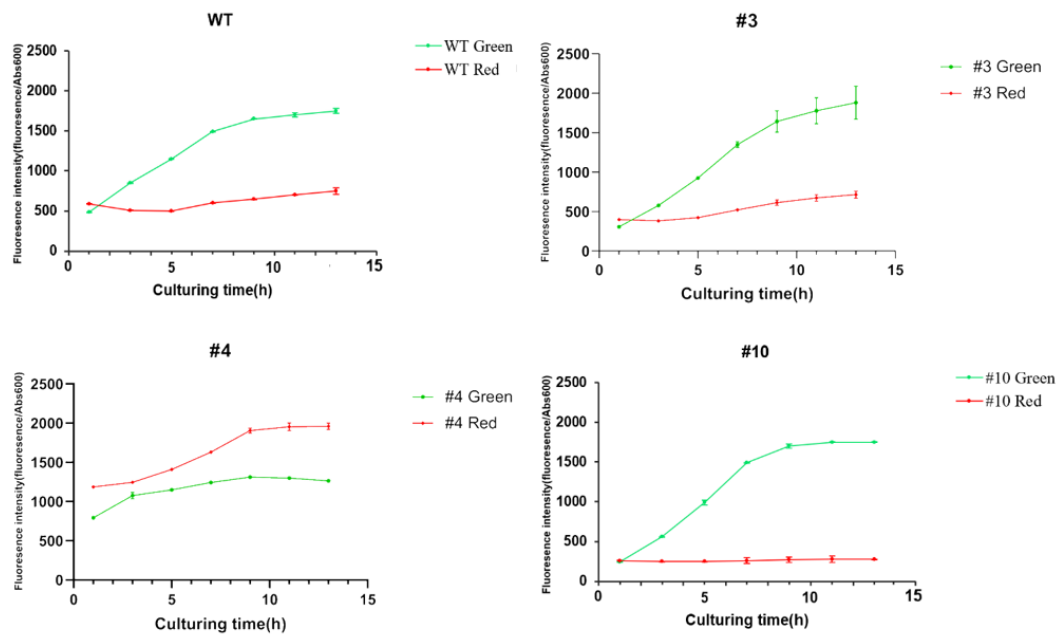

Figure S1. The relative fluorescence values of the cell cultures were measured under red and green light, respectively. Data represent the mean  $\pm$  SD from three independent experiments ( $n = 3$ ).

**Figure S2. The modification of endogenous CRISPRi system**

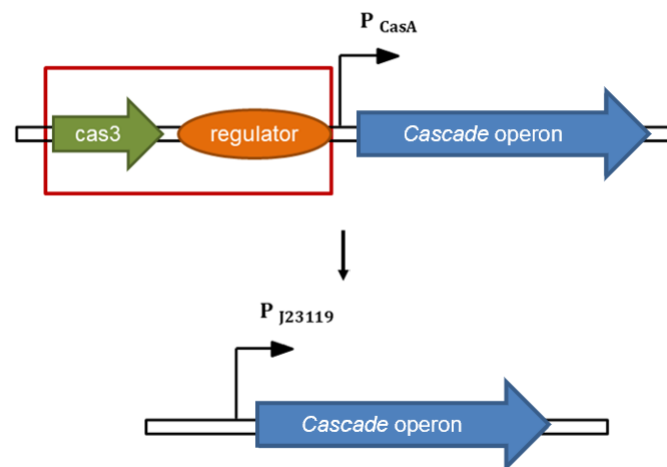

Figure S2 The construction of TOP10 $\Delta$ cas3. Cas3 is knocked out and promoter of Cascade is substituted by promoter J23119 [2].

**Figure S3. sgRNA sequence targeting *gltA***

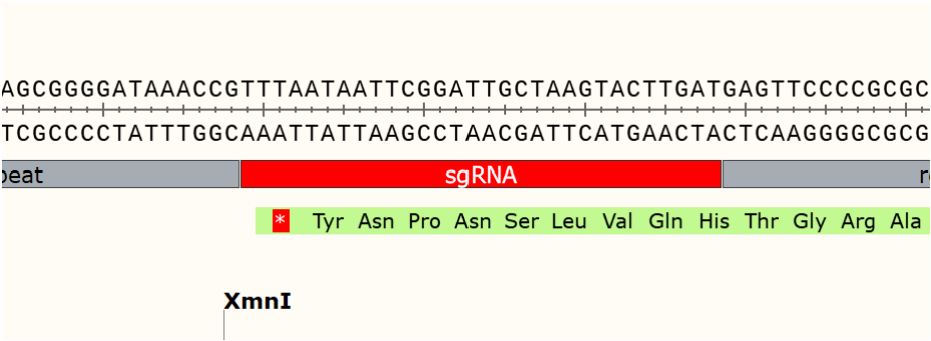

Figure S3. sgRNA sequence targeting *gltA*.

**Figure S4. The regulation effect of different copy-number in light-controlled system**

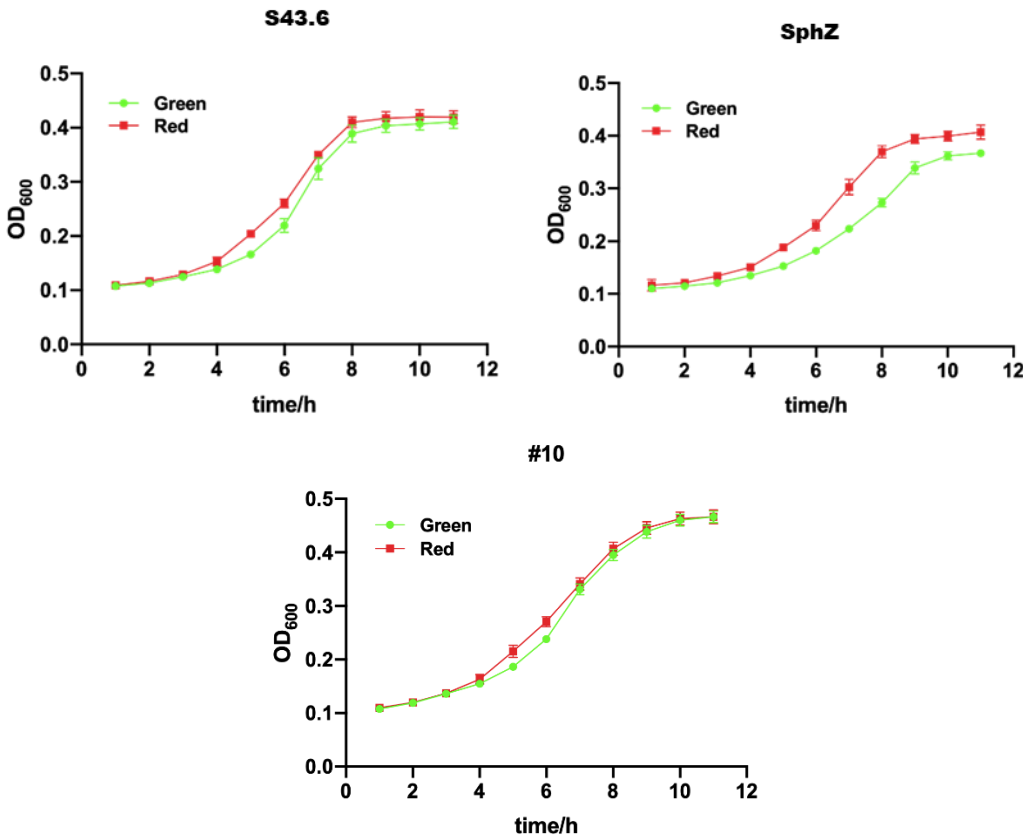

Figure S4. The regulation effect of different copy-number in light-controlled system. For S43.6, crRNA with targeting *gltA* spacer was constructed on medium-copy number plasmid (43.6-crRNA), while for strain SphZ, crRNA was on high-copy number plasmid (phZ-crRNA). Meanwhile #10 was negative control without crRNA. Data represents the mean  $\pm$ SD from each of the three repeats (n=3).

## References

1. Schmidl, S.R.; Sheth, R.U.; Wu, A.; Tabor, J.J. Refactoring and Optimization of Light-Switchable Escherichia coli Two-Component Systems. *ACS Synth. Biol.* **2014**, *3*, 820–831.
2. Chang, Y.; Su, T.; Qi, Q.; Liang, Q. Easy regulation of metabolic flux in Escherichia coli using an endogenous type I-E CRISPR-Cas system. *Microb. Cell Factories* **2016**, *15*, 195.
